1 **Historical records of plant-insect interactions in subarctic Finland**

2

3 **Authors**

4 Leana Zoller<sup>1,2\*</sup>, Tiffany M. Knight<sup>1,3,2</sup>

5

6

7 **Affiliations**

8 <sup>1</sup>Institute of Biology, Martin Luther University Halle-Wittenberg; Am Kirchtor 1, 06108 Halle

9 (Saale), Germany.

10 <sup>2</sup>German Centre for Integrative Biodiversity Research (iDiv) Halle-Jena-Leipzig; Puschstraße 4,

11 04103 Leipzig, Germany.

12 <sup>3</sup>Department of Community Ecology, Helmholtz Centre for Environmental Research- UFZ;

13 Theodor-Lieser-Straße 4, 06120 Halle (Saale), Germany.

14

15 \* Corresponding author. Email: [leana.zoller@idiv.de](mailto:leana.zoller@idiv.de)

## 16 **Abstract**

17 Historical ecological records document the diversity and composition of communities decades  
18 or centuries ago and provide a valuable benchmark for modern comparisons. Historical  
19 datasets on plant-animal interactions allow for modern comparisons that examine the stability  
20 of species and interaction networks over long periods of time and in response to  
21 anthropogenic change. Here we present a curated dataset of interactions between plants and  
22 insects in subarctic Finland, generated from digitizing a historical document from the late 19th  
23 century and updating the taxonomy using currently accepted nomenclature. The resulting  
24 dataset contains 654 records of plant-insect interactions observed during the years 1895-  
25 1900, and includes 498 unique interactions between 86 plant species and 173 insect taxa.  
26 Syrphidae, Apidae and Muscidae were the insect families involved in most interactions, and  
27 interactions were most observed with the plant species *Angelica archangelica*, *Salix caprea*,  
28 and *Chaerophyllum prescottii*. Interaction data are available as csv-file and provide a valuable  
29 resource on plant-insect interactions over 120 years ago in a high latitude ecosystem that is  
30 undergoing rapid climate change.

31

## 32 **Background & Summary**

33 The rapid degradation of natural ecosystems in the Anthropocene<sup>1,2</sup> highlights the increasing  
34 need for conservation actions that preserve life-sustaining ecosystem functions and services<sup>3</sup>.  
35 Pollination is a vital ecosystem service as most angiosperm plants, including many crops, rely  
36 on animal pollination for sexual reproduction<sup>4,5</sup>. There have been recent observations of  
37 declines of pollinators and the plants they are associated with<sup>6</sup>, driven by intensive agriculture,  
38 pesticides, the spread of invasive species and pathogens, and climate change<sup>7</sup>. It may take  
39 decades or centuries for the full effects of these drivers on plant-pollinator interactions to be  
40 realized, and short-term studies may therefore underestimate their effects. Currently, our  
41 knowledge on temporal and spatial changes in plant-pollinator interactions is limited, as the  
42 vast majority of studies documenting plant-pollinator interactions encompass only one or a  
43 few years of the present<sup>8</sup> and come from North America and Western Europe<sup>9</sup>.

44 One way to bridge this knowledge gap is through the use of historical records, especially from  
45 understudied regions (e.g. tropical and arctic regions). Plant-pollinator visitation networks are  
46 constructed through observations of insects coming into contact with the reproductive organs  
47 of flowers. Historical datasets documenting these field observations provide rare  
48 opportunities to examine long-term changes in pollinator communities and the structure of  
49 plant-pollinator networks. For example, Burkle and colleagues<sup>10</sup> reconstructed a plant-bee  
50 visitation network from the late 1800s in Illinois (USA) using a historical document<sup>11</sup>. They  
51 resampled the study location, and documented that 55% of the bee species were locally  
52 extirpated. Remaining species dramatically restructured their interactions, likely due to spatial  
53 and temporal mismatches between interacting species caused by habitat fragmentation and  
54 climate change. Research from other areas of the world are urgently needed to understand  
55 the generality of these results<sup>12</sup>. For example from arctic and subarctic regions, which are  
56 experiencing more rapid climate change compared to the global average<sup>13</sup> and where flies are  
57 the most important pollinators<sup>14,15</sup>. Historical datasets from these regions would provide an  
58 important benchmark of plant-pollinator interaction structure, enabling many modern  
59 research questions in pollination ecology.

60 Here, we present a digitized dataset on plant-insect interactions in subarctic Finland derived  
61 from a historical document. In the years 1895-1900, Frans Silén observed interactions  
62 between plants and insects in Kittilä, Finland and published these observations in the  
63 naturalist journal *Meddelanden af Societas pro Fauna et Flora Fennica*<sup>16</sup>. Kittilä is located ~120  
64 km north of the Arctic Circle in a boreal biome. Silén's original publication is written in Swedish  
65 language and consists of a list of observations of 86 plant species visited by a total of 187 insect  
66 taxa, resulting in 503 unique interactions. Further, date (day, month and year) and verbatim  
67 locality of the observation as well as information on sex, behaviour, and insect quantity in

68 categories (e.g. “scarce”, “many”) along with additional field notes and comments are  
69 included. Both plant and insect names were validated to match the currently accepted  
70 nomenclature and their higher taxonomical classifications were extracted. After validation,  
71 the dataset encompasses 173 insect taxa interacting with 86 plant species, resulting in 498  
72 unique interactions.

73

## 74 **Methods**

75 In a first step, Silén’s original records were manually digitized (InteractionData\_Silen.csv). Each  
76 unique plant-insect interaction per site and date was entered as a new row of data (hereafter  
77 referred to as ‘record’). Full verbatim taxonomic species names of plants and pollinators (as  
78 originally stated in the historical document), verbatim locality and date (year, month and day)  
79 were included. Additional information on insect sex (i.e. m/f), insect behaviour (e.g. nectar  
80 sucking) and categorical abundance (e.g. “scarce”, “many”) was available for many records.  
81 We included categorical abundance in the original Swedish language and also provided an  
82 English translation. Some records in the historic document contained additional comments or  
83 field notes and they were also included in the dataset, but only as English translation. In a  
84 second step, verbatim taxonomic plant and insect names were updated to currently accepted  
85 names (see Technical Validation section) and added to the interaction dataset.

86

## 87 **Data Records**

88 Available data formats and structure: The interaction dataset and two datasets containing  
89 information on the taxonomic validation of plants and insects are formatted as csv-files  
90 (InteractionData\_Silen.csv, Plants\_TaxonomicValidation.csv and  
91 Insects\_TaxonomicValidation.csv) and are available on the figshare repository. All column  
92 names are described in Tables 1-2.

93 Data characterization: In the sections below, we characterize the geographic, taxonomic and  
94 temporal coverage of the interaction data.

95 Geographic coverage: Records stem from the region around Kittilä, Finnish Lapland  
96 (67°39'58.3"N 24°53'25.8"E).

97 Taxonomic coverage: Originally, Silén’s data included 654 records of 187 insect taxa visiting 86  
98 plant species, resulting in a total of 503 unique interactions. Of the 187 insect taxa identified  
99 by Silén, 164 were resolved to species level (94.95% of records). Among them, three species  
100 (6 records) contained information on subspecies. Nineteen taxa were resolved to genus level  
101 (4.28% of records) and five taxa were resolved to subfamily, family or superfamily level (0.76%  
102 of records). Plant species were all resolved to species level, among them, three species (18  
103 records) contained information on subspecies. After cross-checking taxonomic names, 153  
104 taxa were resolved to species level (94.34% of records), 13 to genus resolution (2.60% of  
105 records), six to family level (2.14% of records) and one to order level (0.92% of records). All  
106 plant species could be resolved to species level. The recorded insect species belong to four  
107 orders (Diptera, Hymenoptera, Lepidoptera and Coleoptera) and include 88 genera in 30  
108 families. The most frequently recorded insect families were Syrphidae, Apidae and Muscidae  
109 (Fig. 1) and the most frequently recorded genera were *Bombus*, *Platycheirus* and *Thricops* (Fig.  
110 2a). Salicaceae, Apiaceae and Asteraceae were the most frequently recorded plant species, (Fig.  
111 1), and in particular the plant species *Angelica archangelica*, *Salix caprea*, and *Chaerophyllum*  
112 *prescottii* (Fig. 2b).

113 Temporal coverage: The records span 126 days between May and August of the years 1895-  
114 1900. Six records had information on neither day, month nor year, and 11 records included  
115 information on year, but not month or day. The bulk of the records (60.91%) stem from the  
116 years 1896 and 1897 and the months June and July (76.3%) (Fig. 3).

117

## 118 **Technical Validation**

119 Each unique verbatim taxonomic name was cross-checked with the GBIF Backbone Taxonomy  
120 and Finnish species checklists and, if necessary, the taxonomic name was updated to the  
121 currently accepted name (according to the GBIF Backbone taxonomy). Additionally, we  
122 extracted information on order, family, and genus of each taxon. When verbatim taxonomic  
123 names could not be resolved to a valid taxon using the GBIF Backbone Taxonomy and  
124 checklists, we manually researched taxonomic revisions of the verbatim taxa in other  
125 databases, publications or checklists. When the verbatim species names could not be resolved  
126 to any currently valid species, the next finest available resolution (genus, family or order), was  
127 recorded. Further, we verified if the derived species have previously been reported from  
128 Finland using the online portal (laji.fi) of the Finnish Biodiversity Information Facility (FinBIF).  
129 Verbatim taxonomic names with corresponding updated names, sources for the new names,  
130 and information of occurrence in Finland as well as the GBIF identifiers of each taxon are  
131 provided for plants and insects in two supplementary data files  
132 (Plants\_TaxonomicValidation.csv and Insects\_TaxonomicValidation.csv).

133

## 134 **Code Availability**

135 No custom code was used to generate the data described in the manuscript. Code used to  
136 create summarizing figures is available online ([https://github.com/LeanaZ/historic-  
137 interactions](https://github.com/LeanaZ/historic-interactions)).

138

## 139 **Acknowledgements**

140 We thank J. Everaars for bringing this historical text to our attention, P. Schnitker for help with  
141 data digitization and J. Kahanpää for expert advice on Diptera taxonomy. This research was  
142 supported by the Alexander von Humboldt professorship and the Helmholtz Recruitment  
143 Initiative, both awarded to TMK, and by the support of iDiv by the German Research  
144 Foundation (FZT 118).

145

## 146 **Author contributions**

147 TMK and LZ conceived the ideas and designed the methodology; LZ led the data digitization;  
148 LZ led the writing of the manuscript. TMK contributed critically to the drafts and gave her final  
149 approval for publication.

150

## 151 **Competing interests**

152 The authors declare no competing interests.

153  
154  
155  
156

## Figures

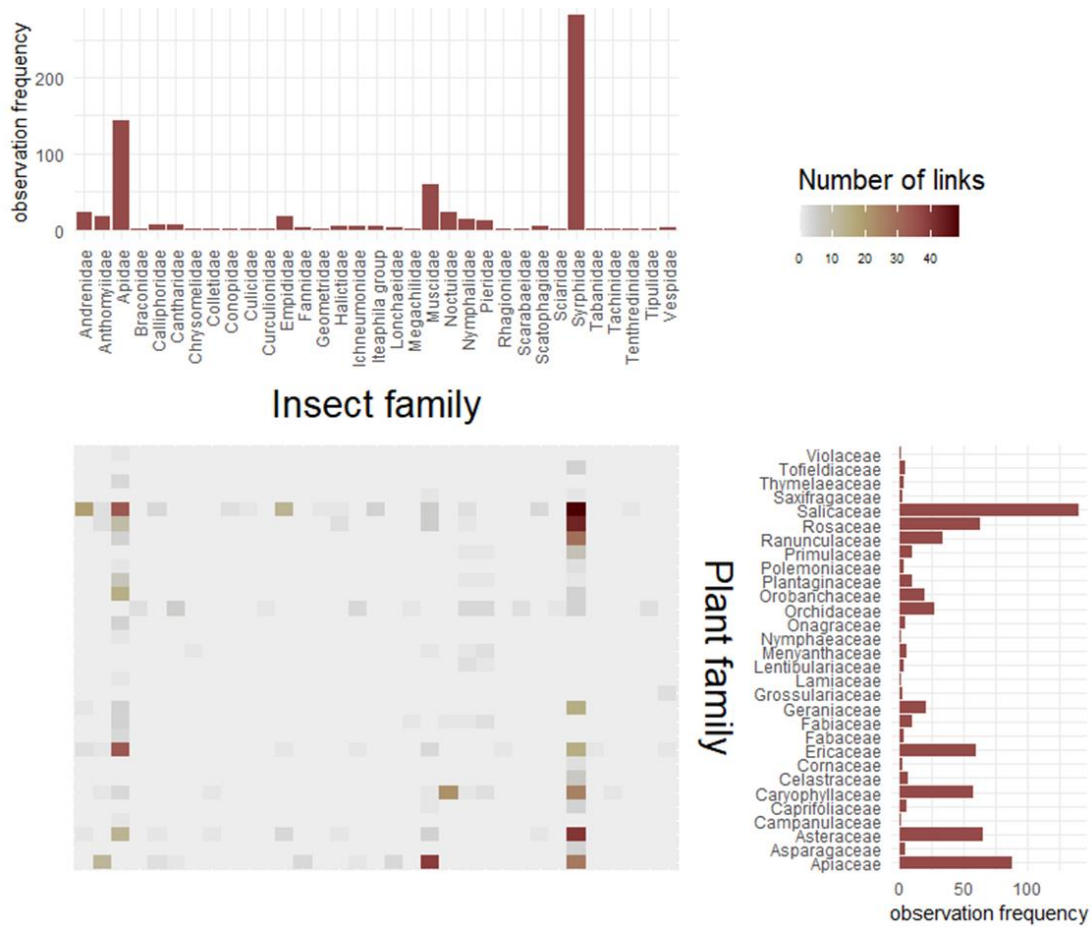

157

158 **Fig. 1.** Overview of the number of records (number of times an interaction between a plant  
159 species and insect taxa was observed across all sites and dates). This information is summed  
160 for each insect family (top) and plant family (right) to allow visualization of the most commonly  
161 recorded families and interaction combinations. Six insect records that were identified to a  
162 level coarser than family were excluded and information on the categorical quantity of the  
163 insects (as stated in the historical source) is not included.

164

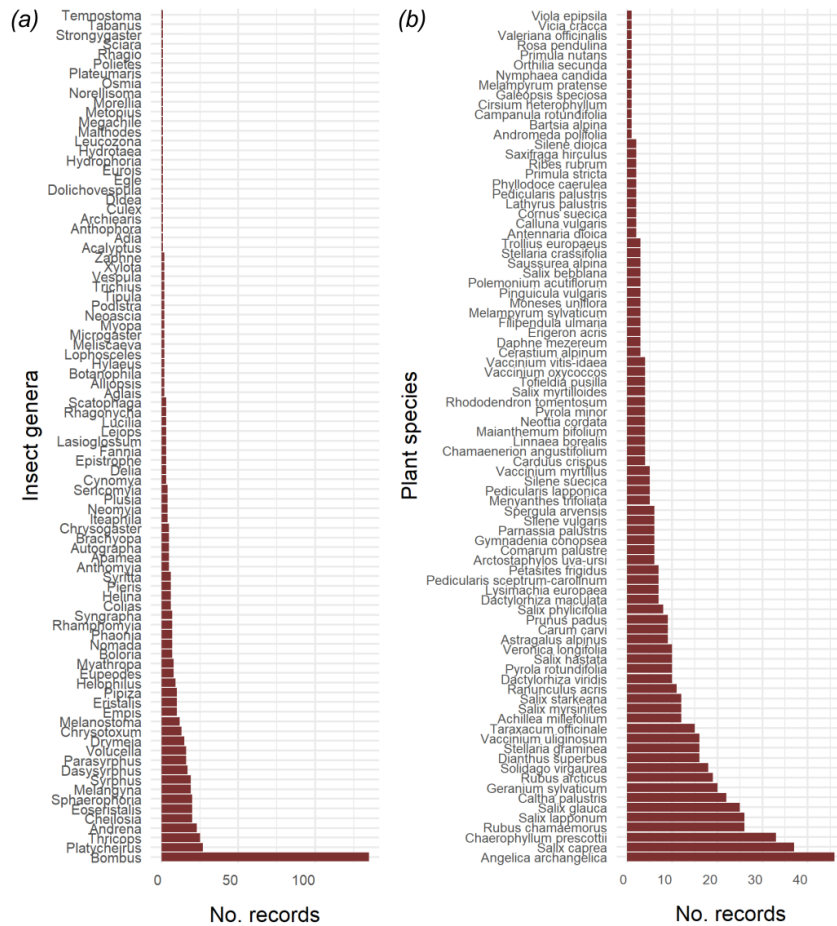

165

166 **Fig. 2.** Taxonomic coverage of records. Overview of the number of records in the dataset by  
 167 **(a)** insect genera and **(b)** plant species. Six insect records that were identified to a level coarser  
 168 than genus were excluded from the figure. Information on the categorical quantity of the  
 169 insects is not included in the number of observations.

170

171

172

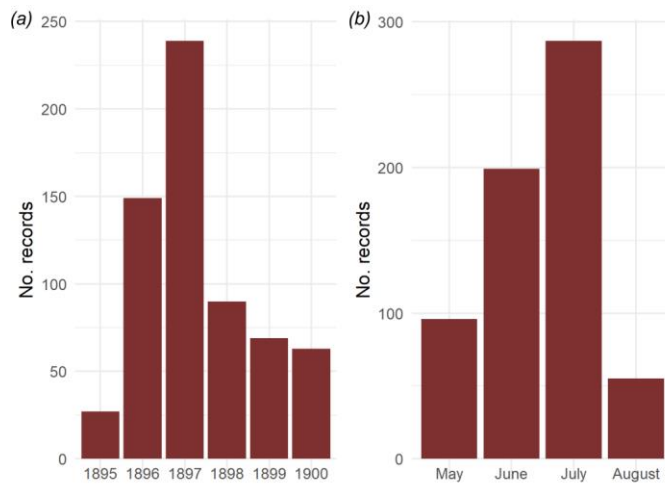

173

174 **Fig. 3.** Temporal coverage of records. (a) Yearly distribution of plant-insect observations in the  
175 dataset and (b) monthly distribution of plant-insect observations in the dataset. Seventeen  
176 records that did not have information on year and month were excluded from the figure.

177

178 **Tables**

179 Table 1. Description of the columns labels used in the Interaction dataset  
180 (InteractionData\_Silen.csv).

| column label                 | column description                                                                                                                 | example                                    |
|------------------------------|------------------------------------------------------------------------------------------------------------------------------------|--------------------------------------------|
| verbatimLocality             | The original textual description of the place of recording as it appeared in the original record                                   | Kittilä                                    |
| country                      | The country in which the verbatim locality occurs                                                                                  | Finland                                    |
| day                          | The integer day of the month on which the event occurred                                                                           | 29                                         |
| month                        | The integer month in which the event occurred                                                                                      | 6                                          |
| year                         | The four-digit year in which the event occurred                                                                                    | 1898                                       |
| eventDate                    | The date when the event was recorded                                                                                               | 1898-06-29                                 |
| plantVerbatimIdentification  | The unaltered original taxonomic identification of the plant as it appeared in the original record, including uncertainties, etc.  | Trientalis europaea L.                     |
| animalVerbatimIdentification | The unaltered original taxonomic identification of the insect as it appeared in the original record, including uncertainties, etc. | Syrphus luniger Meig.                      |
| plantScientificName          | The full scientific name of the plant at the lowest level taxonomic rank that can be determined                                    | Lysimachia europaea (L.) U.Manns & Anderb. |
| plantFamily                  | The full scientific name of the family in which the plant taxon is classified                                                      | Primulaceae                                |
| plantGenericName             | The genus part of the plantScientificName without authorship                                                                       | Lysimachia                                 |
| plantSpecificEpithet         | The name of the species epithet of the plant in plantScientificName                                                                | europaea                                   |
| plantTaxonRank               | The taxonomic rank of the most specific name of the plant in the plantScientificName                                               | species                                    |
| animalScientificName         | The full scientific name of the animal at the lowest level taxonomic rank that can be determined                                   | <i>Eupeodes luniger</i> (Meigen, 1822)     |
| animalOrder                  | The full scientific name of the order in which the animal taxon is classified                                                      | Diptera                                    |
| animalFamily                 | The full scientific name of the family in which the animal taxon is classified                                                     | Syrphidae                                  |
| animalGenericName            | The genus part of the animalScientificName without authorship                                                                      | <i>Eupeodes</i>                            |
| animalSpecificEpithet        | The name of the species epithet of the animal in animalScientificName                                                              | <i>luniger</i>                             |
| animalTaxonRank              | The taxonomic tank of the most specific name of the animal in the animalScientificName                                             | species                                    |
| animalSex                    | The sex of the animal represented in the occurrence (f = female, m = male, m/f = both)                                             | f                                          |
| verbatimAnimalQuantity       | A number or enumeration value for the quantity of animals in the language of the original record                                   | talrik                                     |
| animalQuantity               | A number or enumeration value for the quantity of animals, translated to English                                                   | numerous                                   |
| animalBehavior               | A description of the behavior shown by the animal at the time the occurrence was recorded, translated to English                   | sucking nectar                             |
| fieldNotes                   | Notes taken about the Event                                                                                                        | Visitor persistently sucking nectar        |

181



182 Table 2. Description of the columns labels used in the Taxonomic validation datasets  
 183 (Plants\_TaxonomicValidation.csv and Insects\_TaxonomicValidation.csv).  
 184

| column label           | column description                                                                                                              | example                                                                                                                                                                                                                                    |
|------------------------|---------------------------------------------------------------------------------------------------------------------------------|--------------------------------------------------------------------------------------------------------------------------------------------------------------------------------------------------------------------------------------------|
| verbatimIdentification | The unaltered original taxonomic identification as it appeared in the original record, including uncertainties, etc.            | Trientalis europaea L.                                                                                                                                                                                                                     |
| acceptedNameUsage      | The full name, with authorship and date information if known, of the currently valid (zoological) or accepted (botanical) taxon | <i>Lysimachia europaea</i> (L.) U.Manns & Anderb.                                                                                                                                                                                          |
| taxonID                | An identifier for the set of taxon information (data associated with the Taxon class) on GBIF                                   | 2704179                                                                                                                                                                                                                                    |
| taxonRank              | The taxonomic rank of the most specific name of the taxon in the scientificName                                                 | species                                                                                                                                                                                                                                    |
| order                  | The full scientific name of the order in which the taxon is classified                                                          | Ericales                                                                                                                                                                                                                                   |
| family                 | The full scientific name of the family in which the taxon is classified                                                         | Primulaceae                                                                                                                                                                                                                                |
| genericName            | The genus part of the scientificName without authorship                                                                         | <i>Lysimachia</i>                                                                                                                                                                                                                          |
| specificEpithet        | The name of the first or species epithet of the taxon in scientificName                                                         | <i>europaea</i>                                                                                                                                                                                                                            |
| scientificName         | The full scientific name of the taxon at the lowest level taxonomic rank that can be determined                                 | <i>Lysimachia europaea</i> (L.) U.Manns & Anderb.                                                                                                                                                                                          |
| occurrenceStatus       | A statement about the presence or absence of the taxon in the country                                                           | present                                                                                                                                                                                                                                    |
| country                | Country for which the occurrenceStatus is recorded                                                                              | Finland                                                                                                                                                                                                                                    |
| reference              | The resources used for validating the taxonomical names. Multiple entries are separated with a vertical bar ( )                 | <i>Lysimachia europaea</i> (L.) U.Manns & Anderb. in GBIF Secretariat (2021). GBIF Backbone Taxonomy. Checklist dataset <a href="https://doi.org/10.15468/39omei">https://doi.org/10.15468/39omei</a> accessed via GBIF.org on 2021-12-14. |

185

## 186 References

- 187 1. Foley, J. A. *et al.* Global Consequences of Land Use. *Science* (2005)  
188 doi:10.1126/science.1111772.
- 189 2. Chase, J., Blowes, S., Knight, T., Gerstner, K. & May, F. Ecosystem decay exacerbates  
190 biodiversity loss with habitat loss. *Nature* **584**, (2020).
- 191 3. Costanza, R. *et al.* Changes in the global value of ecosystem services. *Global*  
192 *Environmental Change* **26**, 152–158 (2014).
- 193 4. Ollerton, J., Winfree, R. & Tarrant, S. How many flowering plants are pollinated by  
194 animals? *Oikos* **120**, 321–326 (2011).
- 195 5. Rodger, J. G. *et al.* Widespread vulnerability of flowering plant seed production to  
196 pollinator declines. *Science Advances* **7**, eabd3524 (2021).
- 197 6. Biesmeijer, J. C. *et al.* Parallel Declines in Pollinators and Insect-Pollinated Plants in  
198 Britain and the Netherlands. *Science* **313**, 351–354 (2006).
- 199 7. Potts, S. G. *et al.* Global pollinator declines: trends, impacts and drivers. *Trends in*  
200 *Ecology & Evolution* **25**, 345–353 (2010).
- 201 8. CaraDonna, P. J. *et al.* Seeing through the static: the temporal dimension of plant–animal  
202 mutualistic interactions. *Ecology Letters* **24**, 149–161 (2021).
- 203 9. Bennett, J. M. *et al.* A review of European studies on pollination networks and pollen  
204 limitation, and a case study designed to fill in a gap. *AoB PLANTS* **10**, (2018).
- 205 10. Burkle, L. A., Marlin, J. C. & Knight, T. M. Plant-Pollinator Interactions over 120 Years:  
206 Loss of Species, Co-Occurrence, and Function. *Science* **339**, 1611–1615 (2013).
- 207 11. Robertson, C. Flowers and insects: lists of visitors to four hundred and fifty-three  
208 flowers. Carlinville, IL, USA, C. Robertson. *Science Press Printing Company, Lancaster, PA*  
209 **456**, (1929).
- 210 12. Potts, S. G. *et al.* The assessment report of the Intergovernmental Science-Policy  
211 Platform on Biodiversity and Ecosystem Services on pollinators, pollination and food  
212 production.  
213 [https://www.ipbes.net/sites/default/files/downloads/pdf/individual\\_chapters\\_pollination\\_20170305.pdf](https://www.ipbes.net/sites/default/files/downloads/pdf/individual_chapters_pollination_20170305.pdf) (2016).  
214
- 215 13. Post, E. *et al.* Ecological Dynamics Across the Arctic Associated with Recent Climate  
216 Change. *Science* **325**, 1355–1358 (2009).
- 217 14. Tiusanen, M., Hebert, P. D. N., Schmidt, N. M. & Roslin, T. One fly to rule them all—  
218 muscid flies are the key pollinators in the Arctic. *P. Roy. Soc. B-Biol. Sci.* **283**, 20161271  
219 (2016).
- 220 15. Kearns, C. A. Anthophilous Fly Distribution Across an Elevation Gradient. *The American*  
221 *Midland Naturalist* **127**, 172–182 (1992).
- 222 16. Silén, F. Blombiologiska iakttagelser i Kittilä Lappmark. *Medd. Soc. Fauna et Flora*  
223 *Fennica* **31**, 80–99 (1906).

224
